# Supplementary material
Source: PubMed Central journal article supplement (PMC5221572)
Supplement: NIHMS829055-supplement-1.pdf [file NIHMS829055-supplement-1.pdf]

# **SUPPORTING INFORMATION**

## **Dengue Protease Substrate Recognition: Binding of the Prime Side**

Kuan-Hung Lin, Ellen A. Nalivaika, Kristina L. Prachanronarong, Nese Kurt Yilmaz, Celia A. Schiffer\*

Department of Biochemistry and Molecular Pharmacology, University of Massachusetts Medical School, 364  
Plantation Street, Worcester, MA 01605, United States

\*To whom correspondence should be addressed: E-mail: [celia.schiffer@umassmed.edu](mailto:celia.schiffer@umassmed.edu)

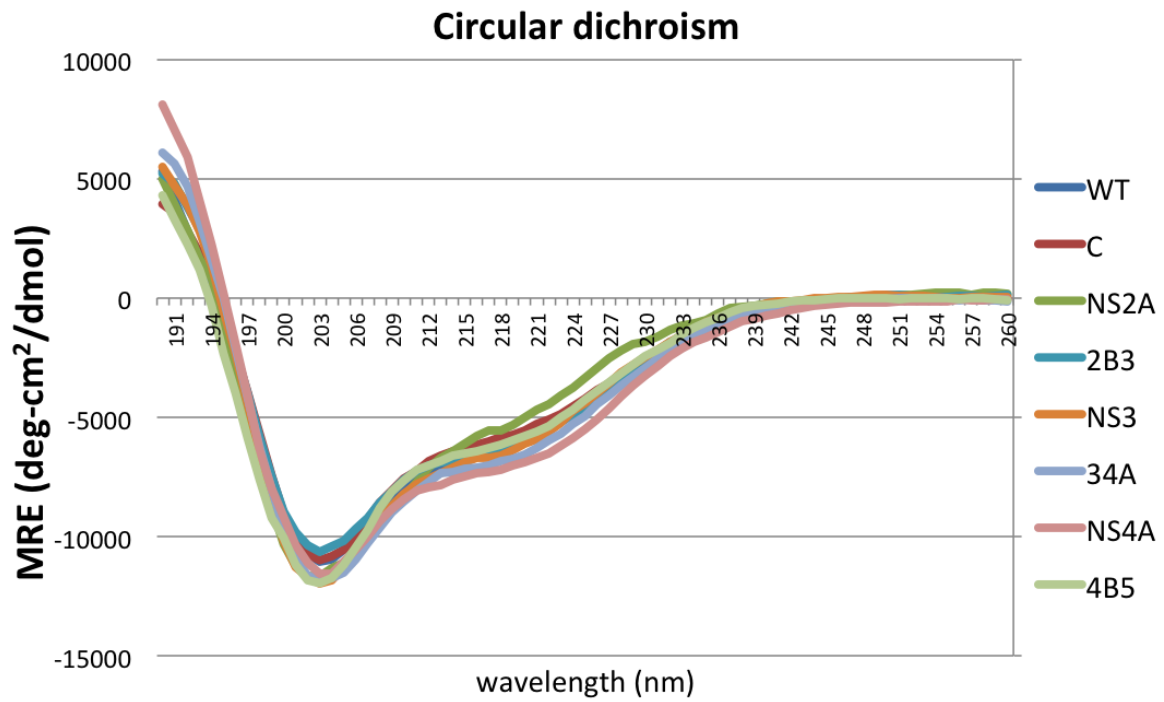

**Figure S1.** The secondary structure is conserved across all aprotinin constructs used in this study. Far-UV circular dichroism spectra of WT aprotinin and aprotinin constructs where the binding loop residues were replaced with DENV3 cleavage site sequences (see main manuscript Figure 1).

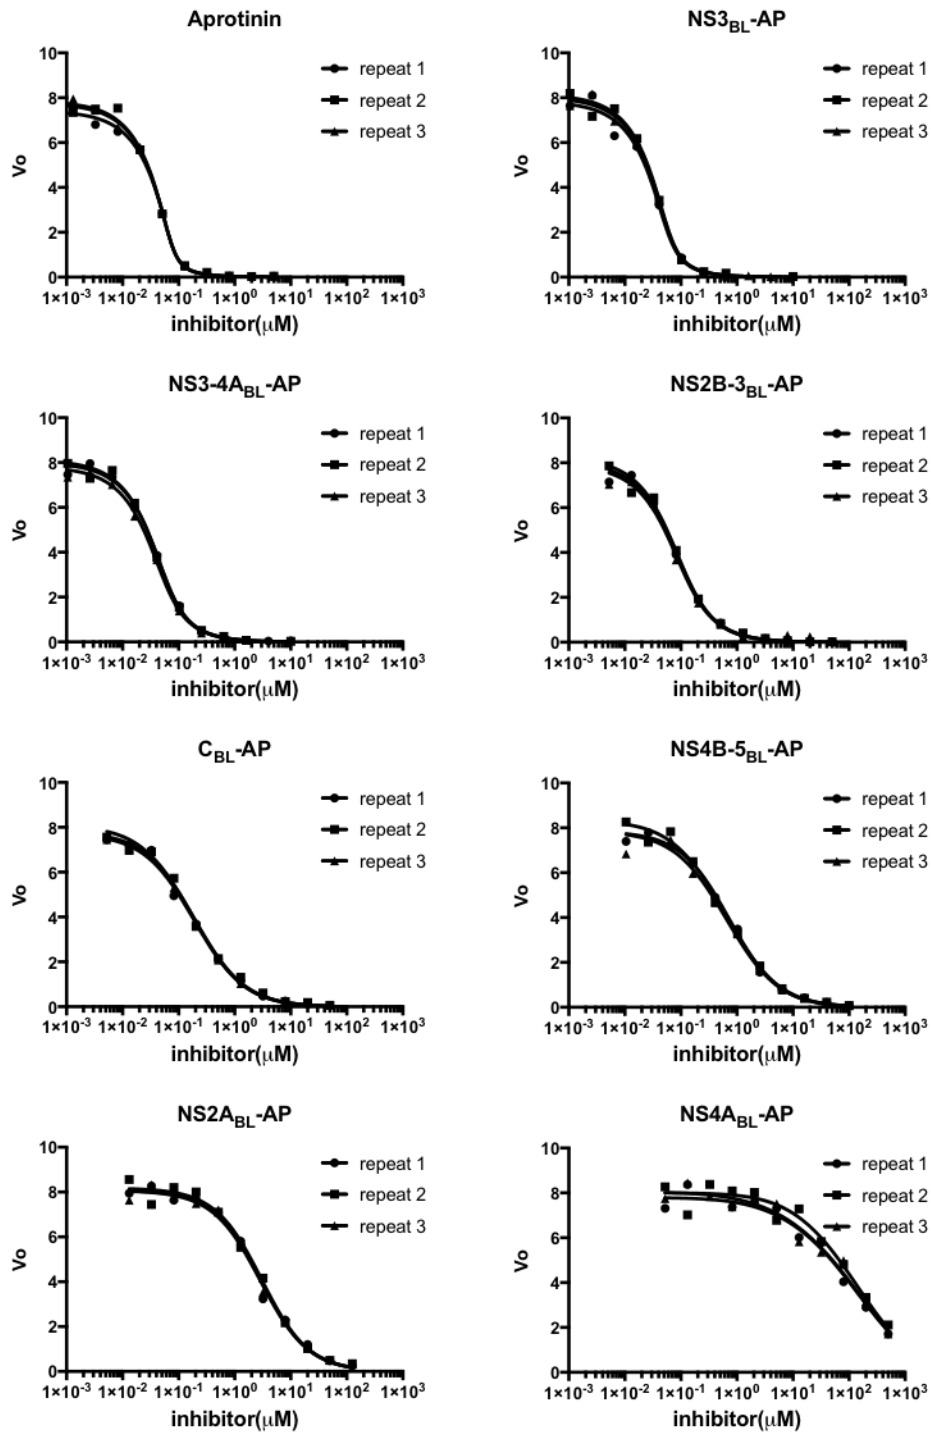

**Figure S2.** The curve fits for the inhibition data of aprotinin constructs and WT-AP against DENV3 WT protease in enzymatic assays, ordered from tightest to weakest binder.

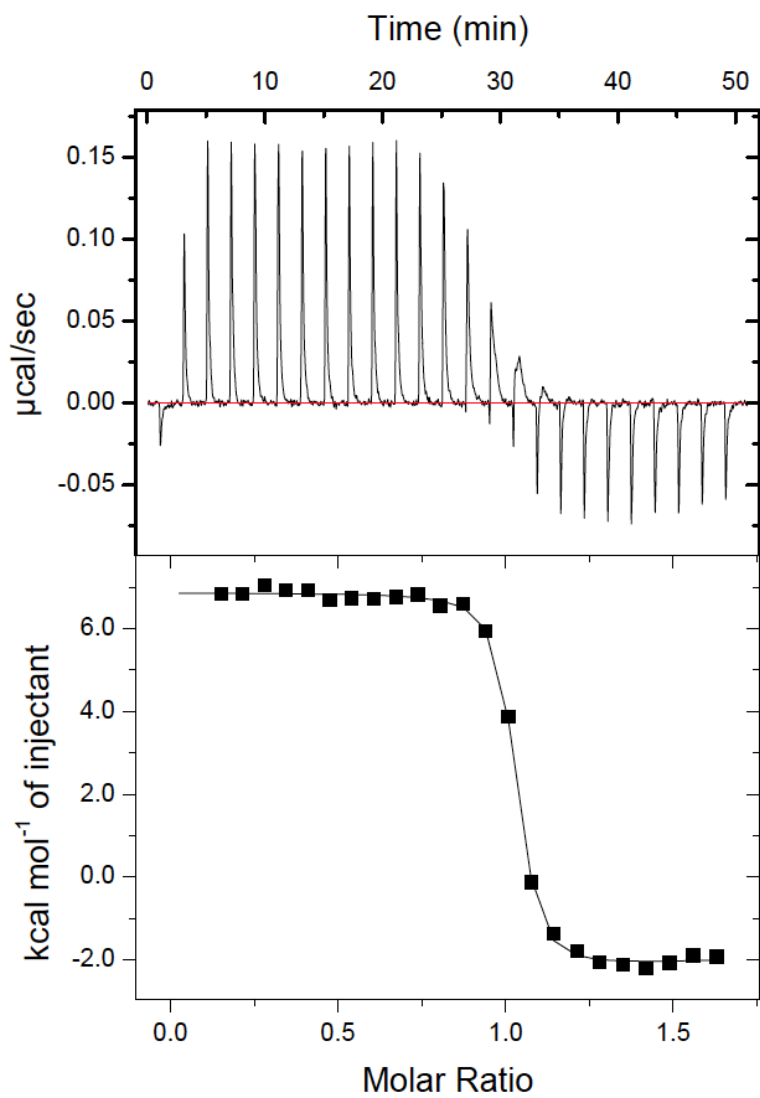

**Figure S3.** ITC titration of WT-AP with DENV3 WT PR.

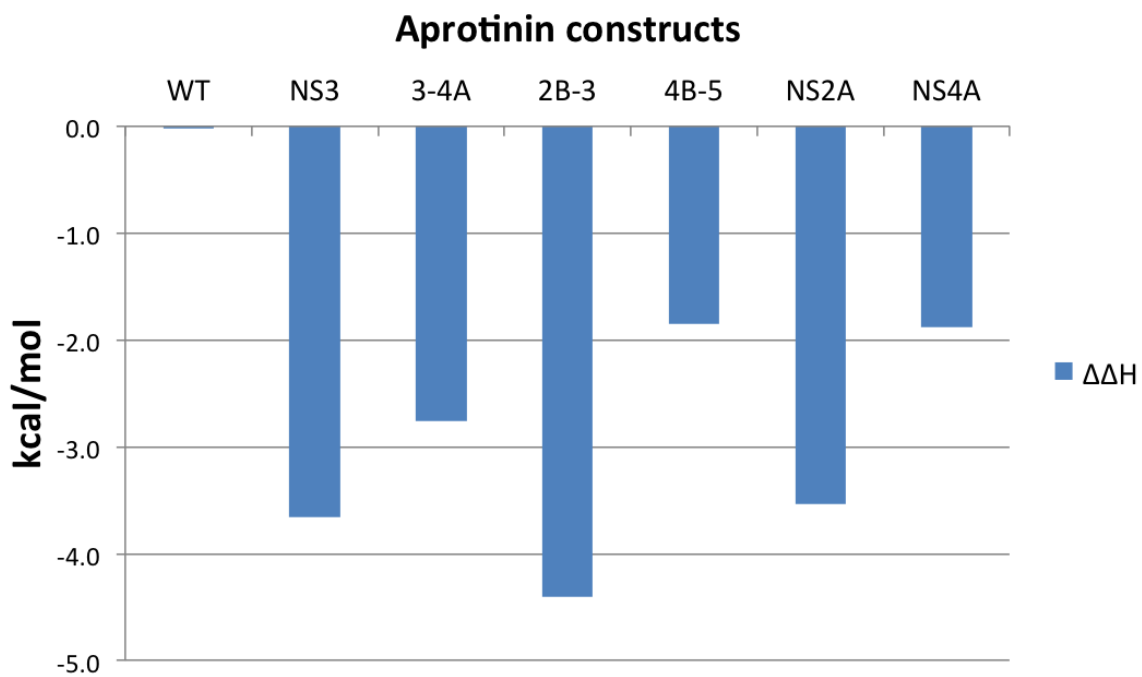

**Figure S4.** The change in enthalpic contribution to the free energy of binding to DENV3 protease for aprotinin constructs relative to WT aprotinin.

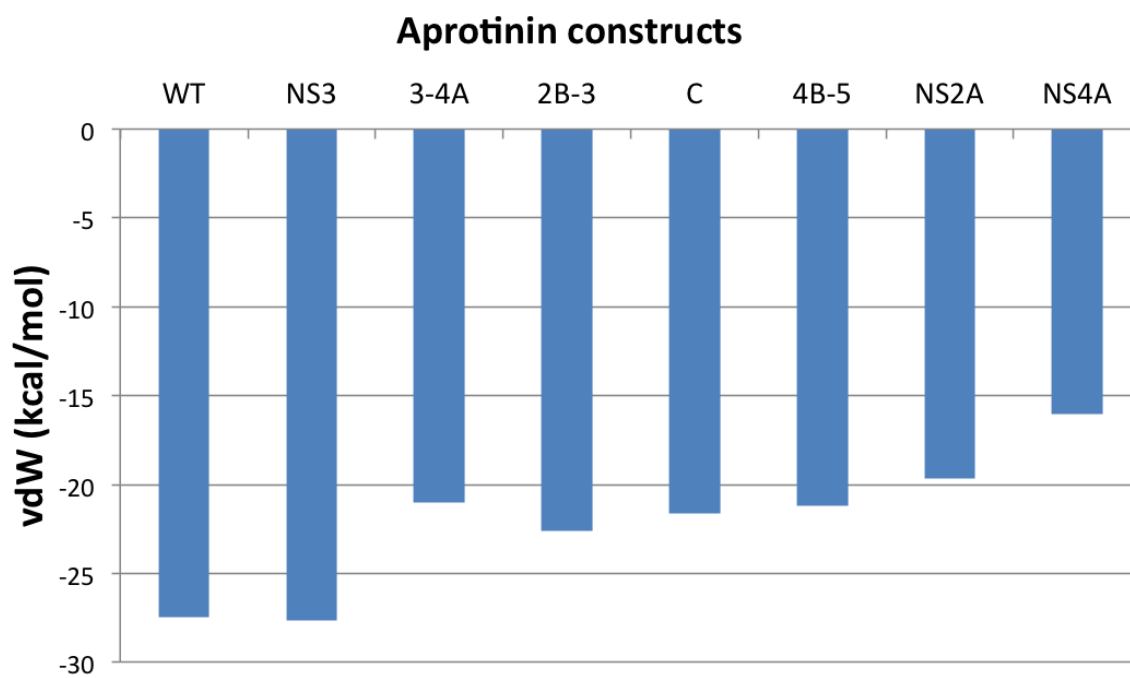

**Figure S5.** The overall binding loop vdW contact energy with DENV3 protease calculated from MD simulations of WT-AP and aprotinin constructs.

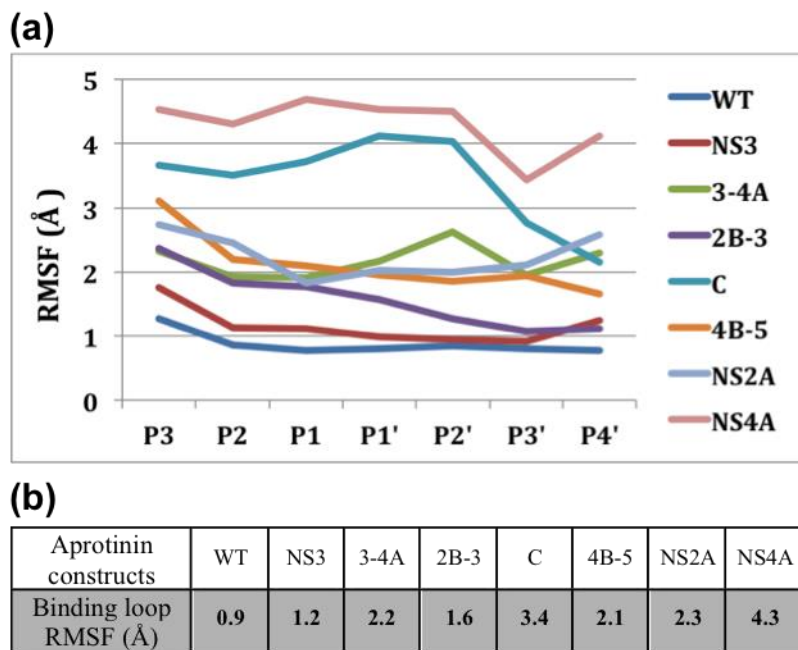

**Figure S6.** Binding loop fluctuations of WT-aprotinin and aprotinin constructs in MD simulations (a) RMSF values by residue (b) average RMSF values of the overall binding loop.

**Table S1.** The sequence alignments of dengue and Zika virus protease polyprotein cleavage sites. Amino acid identities shared with DENV3 are highlighted in yellow, and changes are indicated from green to red for more to less conservative.

NS3

|              | P5       | P4       | P3       | P2       | P1       |  | P1'      | P2'      | P3'      | P4'      | P5'      |
|--------------|----------|----------|----------|----------|----------|--|----------|----------|----------|----------|----------|
| DENV1        | A        | A        | Q        | R        | R        |  | G        | R        | I        | G        | R        |
| DENV2        | A        | A        | Q        | R        | R        |  | G        | R        | I        | G        | R        |
| <b>DENV3</b> | <b>A</b> | <b>A</b> | <b>Q</b> | <b>R</b> | <b>R</b> |  | <b>G</b> | <b>R</b> | <b>V</b> | <b>G</b> | <b>R</b> |
| DENV4        | A        | A        | Q        | R        | R        |  | G        | R        | I        | G        | R        |
| Zika         | A        | A        | Q        | R        | R        |  | G        | R        | I        | G        | R        |

3-4A

|              | P5       | P4       | P3       | P2       | P1       |  | P1'      | P2'      | P3'      | P4'      | P5'      |
|--------------|----------|----------|----------|----------|----------|--|----------|----------|----------|----------|----------|
| DENV1        | A        | A        | G        | R        | R        |  | S        | V        | S        | G        | D        |
| DENV2        | A        | A        | G        | R        | K        |  | S        | L        | T        | L        | N        |
| <b>DENV3</b> | <b>A</b> | <b>A</b> | <b>G</b> | <b>R</b> | <b>K</b> |  | <b>S</b> | <b>I</b> | <b>A</b> | <b>L</b> | <b>D</b> |
| DENV4        | A        | S        | G        | R        | K        |  | S        | I        | T        | L        | D        |
| Zika         | A        | A        | G        | K        | R        |  | G        | A        | A        | F        | G        |

2B-3

|              | P5       | P4       | P3       | P2       | P1       |  | P1'      | P2'      | P3'      | P4'      | P5'      |
|--------------|----------|----------|----------|----------|----------|--|----------|----------|----------|----------|----------|
| DENV1        | K        | K        | K        | Q        | R        |  | S        | G        | V        | L        | W        |
| DENV2        | V        | K        | K        | Q        | R        |  | A        | G        | V        | L        | W        |
| <b>DENV3</b> | <b>K</b> | <b>Q</b> | <b>T</b> | <b>Q</b> | <b>R</b> |  | <b>S</b> | <b>G</b> | <b>V</b> | <b>L</b> | <b>W</b> |
| DENV4        | V        | K        | T        | Q        | R        |  | S        | G        | A        | L        | W        |
| Zika         | K        | T        | G        | K        | R        |  | S        | G        | A        | L        | W        |

C

|              | P5       | P4       | P3       | P2       | P1       |  | P1'      | P2'      | P3'      | P4'      | P5'      |
|--------------|----------|----------|----------|----------|----------|--|----------|----------|----------|----------|----------|
| DENV1        | N        | R        | R        | K        | R        |  | S        | V        | T        | M        | L        |
| DENV2        | N        | R        | R        | R        | R        |  | S        | A        | G        | M        | I        |
| <b>DENV3</b> | <b>N</b> | <b>K</b> | <b>R</b> | <b>K</b> | <b>K</b> |  | <b>T</b> | <b>S</b> | <b>L</b> | <b>C</b> | <b>L</b> |
| DENV4        | N        | G        | R        | K        | R        |  | S        | T        | I        | T        | L        |
| Zika         | N        | A        | R        | K        | E        |  | K        | K        | R        | R        | G        |

4B-5

|              | P5       | P4       | P3       | P2       | P1       |  | P1'      | P2'      | P3'      | P4'      | P5'      |
|--------------|----------|----------|----------|----------|----------|--|----------|----------|----------|----------|----------|
| DENV1        | G        | G        | G        | R        | R        |  | G        | T        | G        | A        | Q        |
| DENV2        | T        | N        | T        | R        | R        |  | G        | T        | G        | N        | I        |
| <b>DENV3</b> | <b>G</b> | <b>T</b> | <b>G</b> | <b>K</b> | <b>R</b> |  | <b>G</b> | <b>T</b> | <b>G</b> | <b>S</b> | <b>Q</b> |
| DENV4        | Q        | T        | P        | R        | R        |  | G        | T        | G        | T        | T        |
| Zika         | G        | L        | V        | K        | R        |  | R        | G        | G        | G        | T        |

NS2A

|              | P5       | P4       | P3       | P2       | P1       |  | P1'      | P2'      | P3'      | P4'      | P5'      |
|--------------|----------|----------|----------|----------|----------|--|----------|----------|----------|----------|----------|
| DENV1        | T        | T        | S        | Q        | K        |  | T        | T        | W        | L        | P        |
| DENV2        | S        | S        | Q        | Q        | K        |  | T        | D        | W        | I        | P        |
| <b>DENV3</b> | <b>S</b> | <b>S</b> | <b>M</b> | <b>R</b> | <b>K</b> |  | <b>T</b> | <b>D</b> | <b>W</b> | <b>L</b> | <b>P</b> |
| DENV4        | C        | L        | Q        | K        | Q        |  | S        | H        | W        | V        | E        |
| Zika         | G        | S        | V        | K        | K        |  | N        | L        | P        | F        | V        |

NS4A

|              | P5       | P4       | P3       | P2       | P1       |  | P1'      | P2'      | P3'      | P4'      | P5'      |
|--------------|----------|----------|----------|----------|----------|--|----------|----------|----------|----------|----------|
| DENV1        | P        | D        | R        | Q        | R        |  | T        | P        | Q        | D        | N        |
| DENV2        | P        | E        | K        | Q        | R        |  | T        | P        | Q        | D        | N        |
| <b>DENV3</b> | <b>P</b> | <b>E</b> | <b>K</b> | <b>Q</b> | <b>R</b> |  | <b>T</b> | <b>P</b> | <b>Q</b> | <b>D</b> | <b>N</b> |
| DENV4        | P        | E        | K        | Q        | R        |  | T        | P        | Q        | D        | N        |
| Zika         | P        | E        | K        | Q        | R        |  | S        | P        | Q        | D        | N        |



**Table S2.** The thermodynamic parameters derived from ITC experiments of WT-AP and aprotinin constructs binding to DENV3 protease. The energy values are in kcal/mol.

| <b>Aprotinin</b> | <b>Kd (nM)</b>                               | <b><math>\Delta G</math></b> | <b><math>\Delta H</math></b> | <b><math>-T\Delta S</math></b> |
|------------------|----------------------------------------------|------------------------------|------------------------------|--------------------------------|
| <b>WT</b>        | 1.7 ± 0.7                                    | -11.8 ± 0.3                  | 7.2 ± 0.2                    | -18.9                          |
| <b>NS3</b>       | 2.2 ± 0.5                                    | -11.6 ± 0.1                  | 3.5 ± 1.1                    | -15.1                          |
| <b>3-4A</b>      | 29.5 ± 6.5                                   | -10.1 ± 0.1                  | 4.4 ± 0.1                    | -14.5                          |
| <b>2B-3</b>      | 238.6 ± 21.0                                 | -8.9 ± 0.1                   | 2.8 ± 0.0                    | -11.7                          |
| <b>4B-5</b>      | 816.9 ± 56.9                                 | -8.2 ± 0.0                   | 5.3 ± 0.0                    | -13.5                          |
| <b>NS2A</b>      | 9.5x10 <sup>3</sup> ± 3.0x10 <sup>3</sup>    | -6.7 ± 0.2                   | 3.7 ± 1.1                    | -10.4                          |
| <b>NS4A</b>      | 161.8x10 <sup>3</sup> ± 37.3x10 <sup>3</sup> | -5.1 ± 0.0                   | 5.3 ± 1.1                    | -10.4                          |

**Table S3.** The values of binding loop van der Waals contacts calculated from MD simulations of WT-AP and aprotinin constructs bound to DENV3 protease.

| <b>Residue</b> | <b>WT</b> | <b>NS3</b> | <b>3-4A</b> | <b>2B-3</b> | <b>C</b> | <b>4B-5</b> | <b>NS2A</b> | <b>NS4A</b> |
|----------------|-----------|------------|-------------|-------------|----------|-------------|-------------|-------------|
| <b>P1</b>      | -12.4     | -13.3      | -10.8       | -11.0       | -9.7     | -11.6       | -11.2       | -10.0       |
| <b>P1'</b>     | -4.4      | -3.7       | -4.6        | -5.0        | -4.4     | -3.4        | -3.8        | -2.5        |
| <b>P2'</b>     | -7.1      | -7.6       | -3.7        | -3.6        | -4.9     | -4.1        | -2.5        | -2.9        |
| <b>P3'</b>     | -1.5      | -1.3       | -0.3        | -1.2        | -0.4     | -0.4        | -1.7        | -0.3        |
| <b>P4'</b>     | -2.1      | -1.7       | -1.5        | -1.8        | -2.2     | -1.7        | -0.4        | -0.4        |
| <b>Overall</b> | -27.5     | -27.7      | -21.0       | -22.6       | -21.6    | -21.2       | -19.6       | -16.0       |
